# Supplementary material
Source: MDPI journal article supplement (https://www.mdpi.com/1424-8247/16/4/478)
Supplement: s1 [file s1]

**Analytical Quality by Design: Achieving Robustness of an LC–CAD Method for the Analysis of Non-Volatile Fatty Acids**

**Rasmus Walther <sup>1,†</sup>, Jovana Krmar <sup>2,†</sup>, Adrian Leistner <sup>1</sup>, Bojana Svrkota <sup>2</sup>, Biljana Otašević <sup>2</sup>, Andjelija Malenović <sup>2</sup>, Ulrike Holzgrabe <sup>1,\*</sup> and Ana Protić <sup>2,\*</sup>**

<sup>1</sup> Institute for Pharmacy and Food Chemistry, University of Würzburg, Am Hubland, 97074 Würzburg, Germany

<sup>2</sup> Department of Drug Analysis, Faculty of Pharmacy, University of Belgrade, Vojvode Stepe 450, 11 221 Belgrade, Serbia

\* Correspondence: [ulrike.holzgrabe@uni-wuerzburg.de](mailto:ulrike.holzgrabe@uni-wuerzburg.de) (U.H.); [ana.protic@pharmacy.bg.ac.rs](mailto:ana.protic@pharmacy.bg.ac.rs) (A.P.); Tel.: +49-931-31-85461 (U.H.); +381-1-11-395-1334 (A.P.)

† These authors contributed equally to this work.

**Table S1.** Gradient program from Ilko et al. [21] for the separation of fatty acids using water and ACN each with 0.05 % (v/v) formic acid as mobile phases A and B, respectively, at a flow rate of 0.6 mL/min and a column temperature of 30 °C

| Time [min] | %-A (v/v) | %-B (v/v) |
|------------|-----------|-----------|
| 0 – 5      | 25        | 75        |
| 5 – 15     | 25 – 15   | 75 – 85   |
| 15 – 18    | 25        | 75        |

**Table S2.** Investigated levels of the critical method parameters (CMP) for the method optimization by means of design of experiments using a 3 x 3 face-centred central composite design

| CMP                               | Low level (-1) | Nominal level (0) | High level (+1) |
|-----------------------------------|----------------|-------------------|-----------------|
| Flow rate, $X_1$<br>[mL/min]      | 0.5            | 0.6               | 0.7             |
| Gradient time, $X_2$<br>[min]     | 8.0            | 11.5              | 15.0            |
| Column temperature, $X_3$<br>[°C] | 30.0           | 35.0              | 40.0            |

**Table S3.** Peak characteristics (retention time (RT), capacity factor (k), symmetry factor ( $A_s$ ), width at half height ( $w_{0.05}$ ), separation factor ( $\alpha$ ) and resolution ( $R_s$ )) of the column screening experiments

| Column                                                        | Peak       | Myristic acid     | Palmitic acid     | Stearic acid      | Background noise |
|---------------------------------------------------------------|------------|-------------------|-------------------|-------------------|------------------|
| Symmetry Shield RP8<br>(100 x 3.0 mm, 3.5 $\mu$ m)            | RT         | 3.305 min         | 5.080 min         | 8.083 min         | 1.3 pA           |
|                                                               | k          | 4.92              | 8.10              | 13.49             |                  |
|                                                               | $A_s$      | 1.32              | 1.14              | 1.18              |                  |
|                                                               | $w_{0.05}$ | 0.097 min         | 0.124 min         | 0.172 min         |                  |
|                                                               | $\alpha$   | 1.65              | 1.66              | n.a. <sup>a</sup> |                  |
|                                                               | $R_s$      | 9.44              | 12.06             | n.a. <sup>a</sup> |                  |
| Synergi Max-RP C <sub>12</sub><br>(100 x 4.6 mm, 4.0 $\mu$ m) | RT         | 13.520 min        |                   |                   | 2.5 pA           |
|                                                               | k          | 10.31             |                   |                   |                  |
|                                                               | $A_s$      | 1.03              |                   |                   |                  |
|                                                               | $w_{0.05}$ | 0.222 min         | n.a. <sup>a</sup> | n.a. <sup>a</sup> |                  |
|                                                               | $\alpha$   | n.a. <sup>a</sup> |                   |                   |                  |
|                                                               | $R_s$      | n.a. <sup>a</sup> |                   |                   |                  |
| Hypersil Gold C <sub>18</sub><br>(150 x 2.1 mm, 3.0 $\mu$ m)  | RT         | 3.252 min         | 5.647 min         | 9.828 min         | 0.9 pA           |
|                                                               | k          | 4.63              | 8.77              | 16.0              |                  |
|                                                               | $A_s$      | 1.13              | 1.01              | 1.02              |                  |
|                                                               | $w_{0.05}$ | 0.0690 min        | 0.121 min         | 0.180 min         |                  |
|                                                               | $\alpha$   | 1.90              | 1.82              | n.a. <sup>a</sup> |                  |
|                                                               | $R_s$      | 14.87             | 16.39             | n.a. <sup>a</sup> |                  |
| Kinetex Evo C <sub>18</sub><br>(150 x 4.6 mm, 2.6 $\mu$ m)    | RT         | 9.077 min         | 14.423 min        |                   | 1.1 pA           |
|                                                               | k          | 4.19              | 7.25              |                   |                  |
|                                                               | $A_s$      | 1.07              | 1.01              |                   |                  |
|                                                               | $w_{0.05}$ | 0.127 min         | 0.144             | n.a. <sup>a</sup> |                  |
|                                                               | $\alpha$   | 1.72              | n.a. <sup>a</sup> |                   |                  |
|                                                               | $R_s$      | 23.28             | n.a. <sup>a</sup> |                   |                  |

<sup>a</sup> not applicable

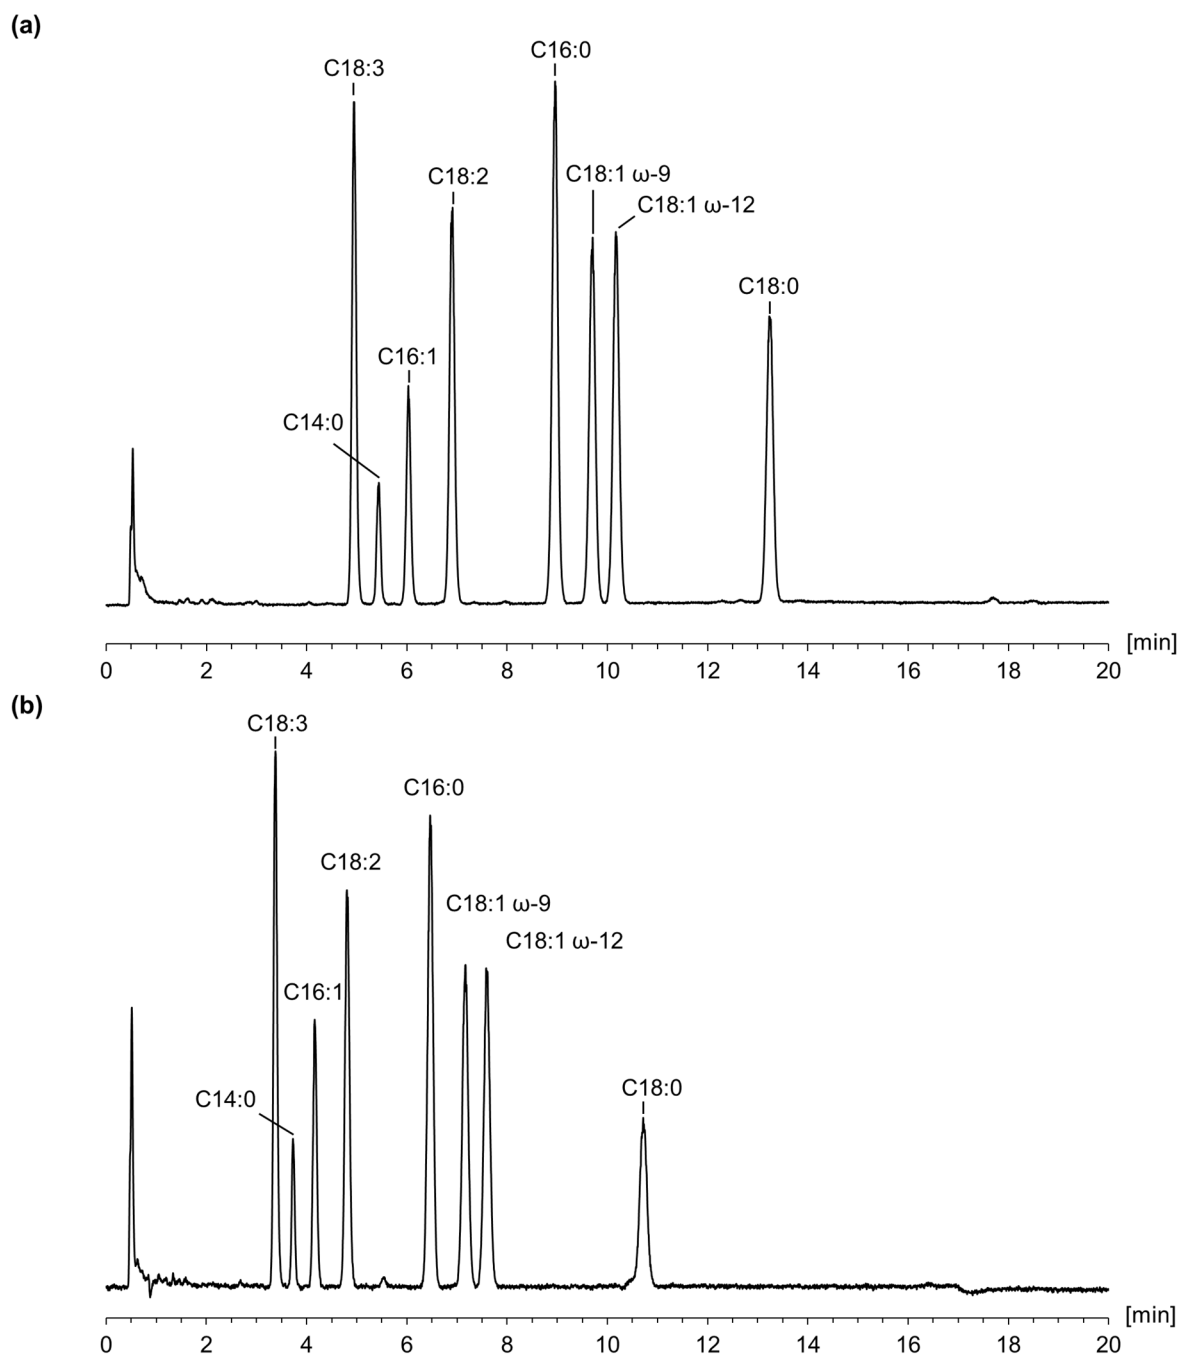

**Figure S1.** Chromatogram of the test solution containing all FAs (0.1 mg/mL) applying a 15 min gradient program with a flow rate of 0.7 mL/min at a column temperature of 20 °C:  
(a) linear increase of the ACN percentage from 65 % (v/v) to 85 % (v/v)  
(b) linear increase of the ACN percentage from 70 % (v/v) to 80 % (v/v)
